# Supplementary material for: Intrinsic antiproliferative activity of the innate sensor STING in T lymphocytes
Source: PubMed Central journal article supplement — J Exp Med. 2017 Jun 5;214(6):1769–85. doi: 10.1084/jem.20161674 (PMC5461003; doi:10.1084/jem.20161674), 2017-06-05
Supplement: JEM_20161674_sm.pdf [file JEM_20161674_sm.pdf]

## SUPPLEMENTAL MATERIAL

Cerboni et al., <https://doi.org/10.1084/jem.20161674>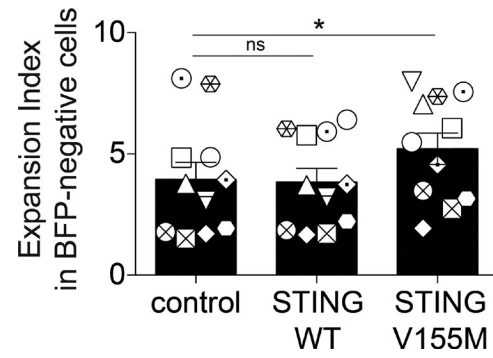

Figure S1. **Proliferation of BFP-negative T cells.** Expansion index in BFP-negative and proliferating cells as in Fig. 1 D.  $n = 11$ . Data are mean  $\pm$  SEM. One-way ANOVA with Tukey's correction was used. \*,  $P < 0.05$ .

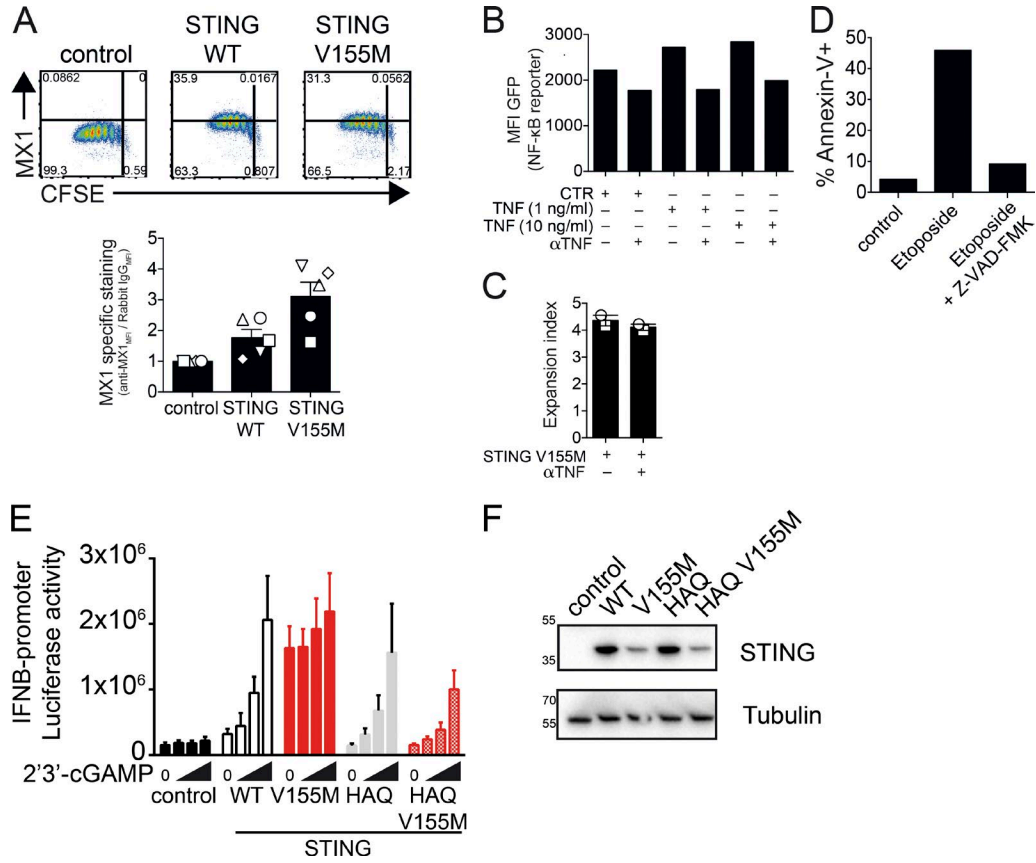

Figure S2. **Controls for STING V155M activation.** (A) Intracellular MX1 expression and proliferation profile (CFSE) in naive CD4<sup>+</sup> T cells transduced with control, STING WT, or STING V155M BFP lentivectors. *n* = 5 donors. Data are mean ± SEM. (B) GFP expression in naive CD4<sup>+</sup> T cells transduced with a lentivector coding for GFP under the control of an NF-κB reporter promoter, after treatment with recombinant TNF or neutralizing anti-TNF antibody. Data are representative of *n* = 2 donors. CTR, control. (C) Expansion index as in Fig. 2 D. *n* = 2. Data are mean ± SEM. (D) Annexin V staining in naive CD4<sup>+</sup> T cells as in Fig. 2 E, after treatment with 25 μM etoposide or etoposide with 50 μM Z-VAD-FMK. Data are representative of *n* = 2 donors. (E) Luciferase activity in 293FT cells cotransfected with empty vector, STING variants, and a Luciferase-coding plasmid under control of the human IFNβ promoter, stimulated with increasing amounts of synthetic 2'3'-cGAMP (top dose, 4 μg/ml; threefold dilutions). *n* = 3 independent experiments. Mean and SEM are plotted. (F) Immunoblot of STING and actin expression in 293FT transfected cells as in E. Molecular mass is shown in kilodaltons.

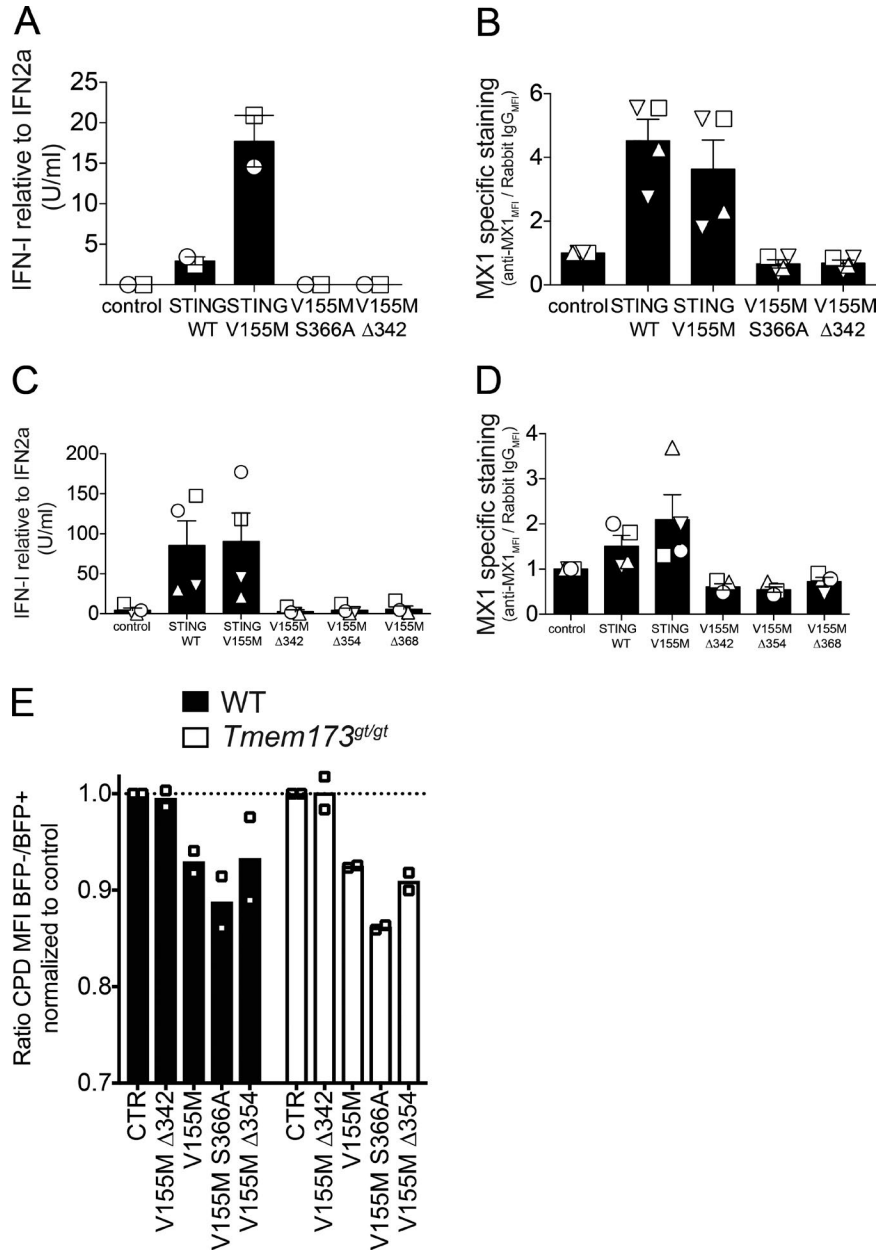

Figure S3. **Activities mediated by STING miniCTT in human and mouse T cells.** (A) Type I IFN activity in supernatants of naive CD4<sup>+</sup> T cells 4 d after transduction with control, STING WT, V155M, V155M S366A, or V155M Δ342 BFP lentivectors. *n* = 2 independent donors. (B) Specific intracellular MX1 staining in naive CD4<sup>+</sup> T cells 4 d after transduction with control, STING WT, V155M, V155M S366A, or V155M Δ342 BFP lentivectors. *n* = 2. (C) Type I IFN activity in supernatants of naive CD4<sup>+</sup> T cells 4 d after transduction with control, STING WT, V155M, V155M Δ342, V155M Δ354, or V155M Δ368 BFP lentivectors. *n* = 2 independent donors. (D) Intracellular staining of MX1 in naive CD4<sup>+</sup> T cells 4 d after transduction with control, STING WT, V155M, V155M Δ342, V155M Δ354, or V155M Δ368 BFP lentivectors. *n* = 2 independent donors. (E) Ratio of proliferation between transduced (BFP positive) and untransduced (BFP negative) mouse CD4<sup>+</sup> T cells after transduction with the indicated lentivectors. *n* = 2 independent mice. Data are mean ± SEM. CPD, cell proliferation profile; CTR, control; MFI, mean fluorescence intensity.

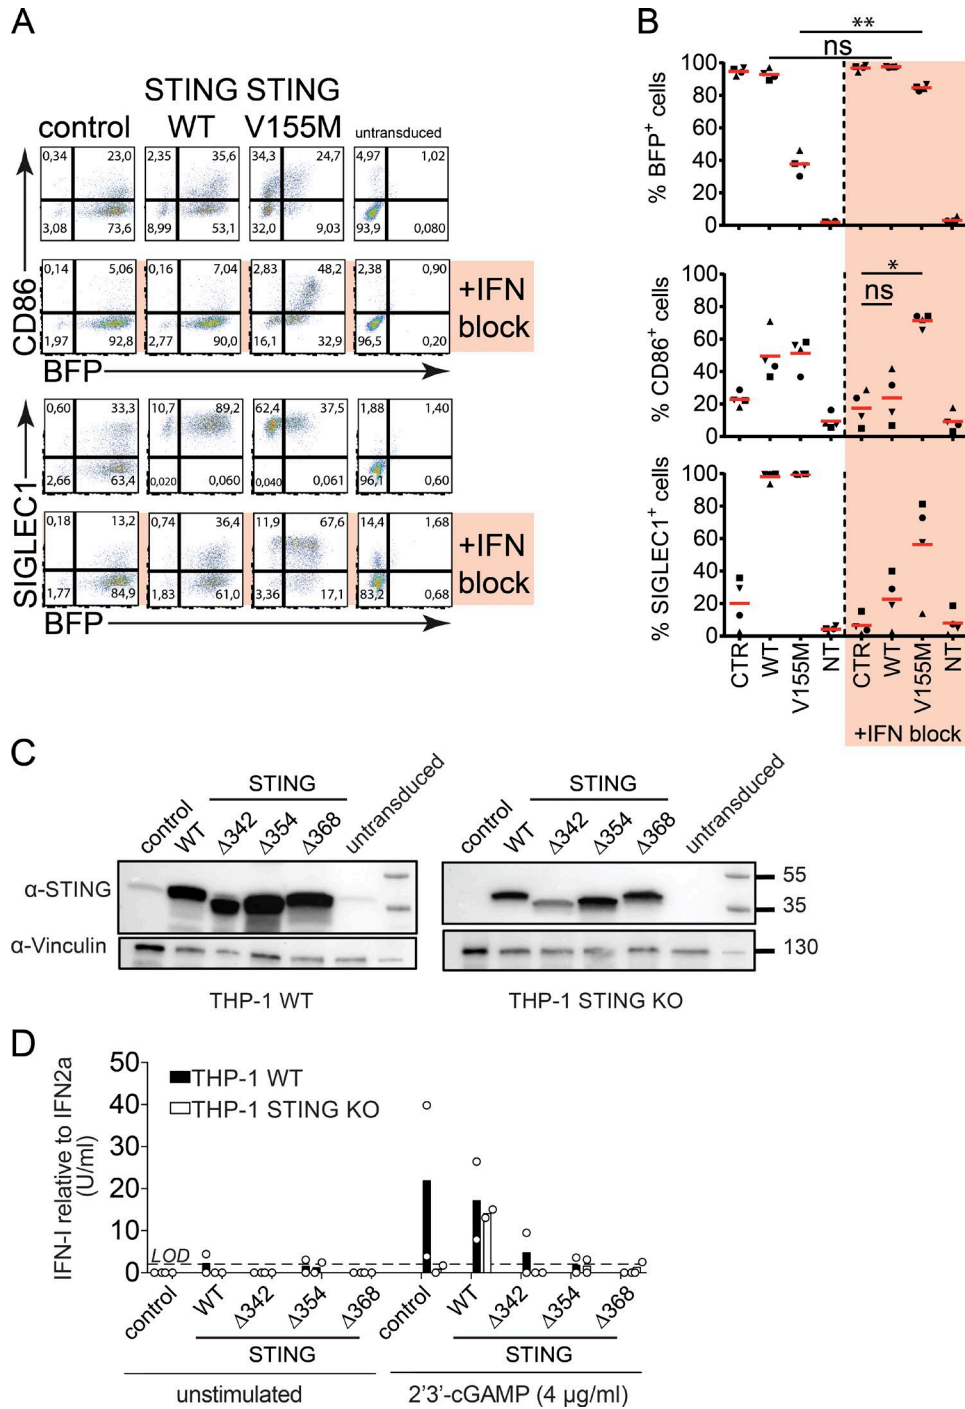

Figure S4. **Activities mediated by STING miniCTT in human DCs and STING KO THP-1 cells.** (A) Neutralization of type I IFN enables lentiviral transduction of DCs with STING V155M, revealing the ability of STING V155M to activate DCs. BFP, CD86, and SIGLEC1 expression in DCs 4 d after transduction with control, STING WT, or STING V155M BFP lentivectors and neutralization of type I IFN. (B) BFP, CD86, and SIGLEC1 expression as in A.  $n = 4$  independent donors combined from two experiments. One-way ANOVA with Tukey's posthoc test was used. \*,  $P < 0.05$ ; \*\*,  $P < 0.01$ . CTR, control; NT, not transduced. (C) Immunoblot of STING and vinculin in THP-1 WT and THP-1 STING KO cells transduced with the indicated BFP lentivectors. Molecular mass is shown in kilodaltons. (D) Type I IFN activity in supernatants of THP-1 WT and THP-1 STING KO cells transduced with the indicated BFP lentivectors, after no stimulation or stimulation with 2'3'-cGAMP-Lipofectamine.  $n = 2$  independent experiments. LOD, limit of detection.

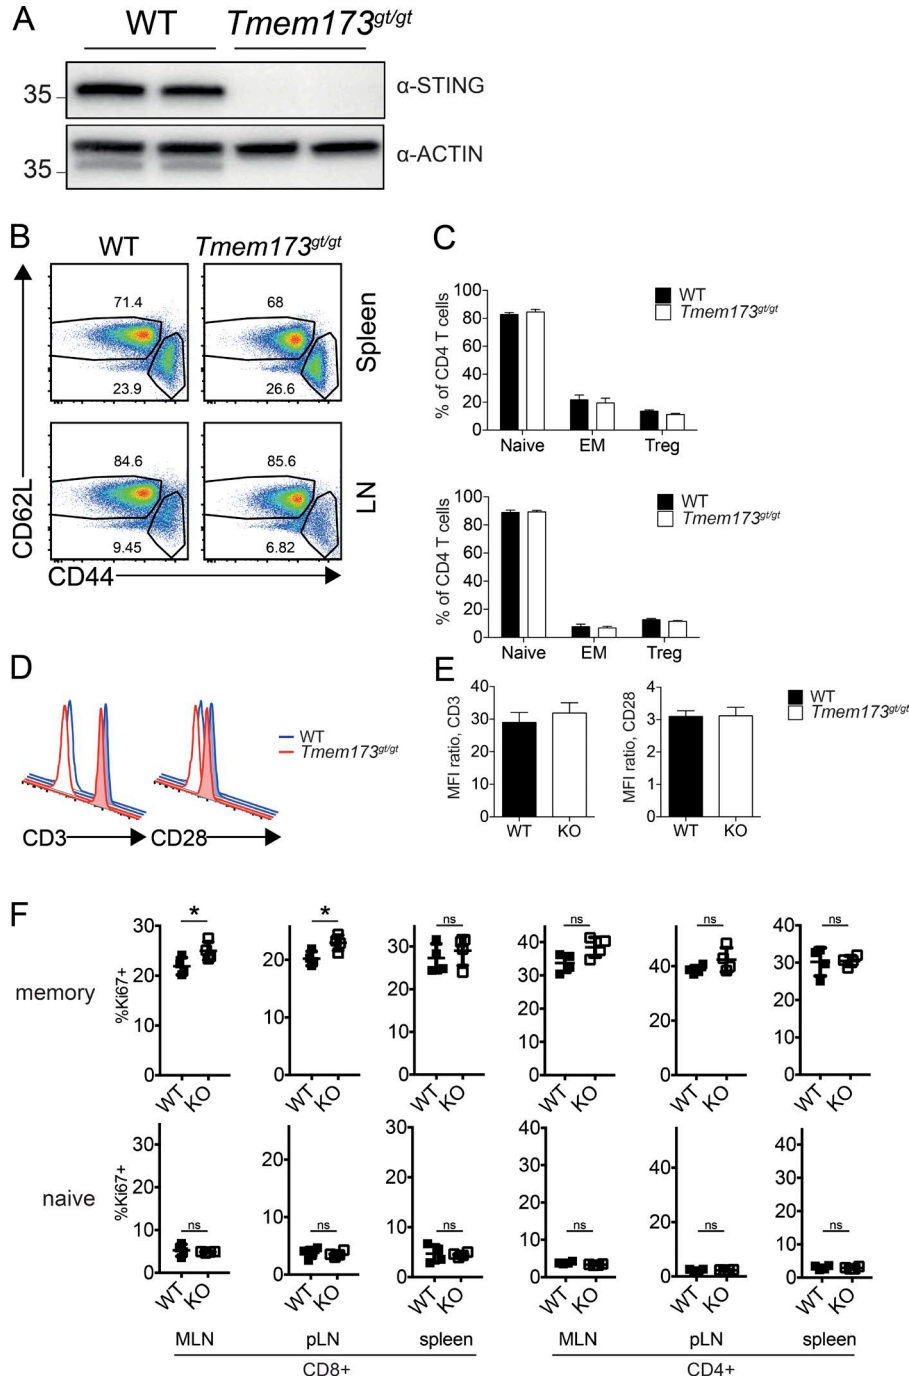

Figure S5. **Phenotypes of T cells from *Tmem173*-deficient mice.** (A) Immunoblot of STING and actin expression in CD8<sup>+</sup> T cells pooled from spleen and lymph nodes of WT and *Tmem173<sup>gt/gt</sup>* mice. *n* = 2. Molecular mass is shown in kilodaltons. (B) Representative dot plots of CD4<sup>+</sup> T cell subpopulations in spleens (top) or peripheral lymph nodes (bottom) of WT or *Tmem173<sup>gt/gt</sup>* mice. (C) Quantification of CD4<sup>+</sup> T cell subpopulations in spleens (top) or lymph node (bottom) of WT or *Tmem173<sup>gt/gt</sup>* mice. *n* = 4 mice from two independent experiments. Data are mean + SEM. EM, effector memory; Treg, regulatory T cell. (D) Representative histogram plots showing expression of CD3 and CD28 surface expression in naive CD4<sup>+</sup> T cells from WT or *Tmem173<sup>gt/gt</sup>* mice. Solid color filling indicates specific antibody, and white filling indicates isotype control staining. (E) Quantification of CD3 and CD28 expression on naive CD4<sup>+</sup> T cells from WT or *Tmem173<sup>gt/gt</sup>* mice. *n* = 4 mice from two independent experiments. Data are mean + SEM. MFI, mean fluorescence intensity. (F) Percentage of Ki67-expressing WT or STING-deficient naive and memory CD4<sup>+</sup> and CD8<sup>+</sup> T cells from lymphoid organs of CD3e/WT or CD3e/*Tmem173<sup>gt/gt</sup>* (KO) mixed bone marrow chimeras. *n* = 4 mice from two independent groups. Data are mean ± SEM. \*, *P* < 0.05. Unpaired Student's *t* test on log-transformed data was used. mLN, mesenteric lymph node; pLN, peripheral lymph node.

Table S1. Clinical immunophenotype of patients carrying an activating *TMEM173* mutation

|                                                           | Age group 1 |                 | Age group 2 |           |           |                 | Age group 3  |                 |
|-----------------------------------------------------------|-------------|-----------------|-------------|-----------|-----------|-----------------|--------------|-----------------|
|                                                           | P1          | Expected values | P5          | P7        | P11       | Expected values | P10          | Expected values |
| <i>TMEM173</i> mutation                                   | V155M       |                 | V155M       | V147M     | N154S     |                 | V155M        |                 |
| Age at analysis                                           | 2           |                 | 11          | 8         | 7         |                 | 14           |                 |
| Absolute counts                                           |             |                 |             |           |           |                 |              |                 |
| CD3 <sup>+</sup>                                          | 3,060       | 1,400–3,700     | 1,782       | 1,560     | 1,444     | 1,200–2,600     | <b>558</b>   | 1,200–2,600     |
| CD4 <sup>+</sup>                                          | 1,935       | 700–2,200       | 999         | 960       | 819       | 650–1,500       | <b>270</b>   | 650–1,500       |
| CD8 <sup>+</sup>                                          | 945         | 490–1,300       | 729         | 560       | 566       | 370–1,100       | <b>270</b>   | 370–1,100       |
| CD19 <sup>+</sup>                                         | 1,170       | 390–1,400       | 621         | 380       | 410       | 270–860         | <b>1,206</b> | 110–570         |
| CD16 <sup>+</sup> CD56 <sup>+</sup>                       | 225         | 130–720         | 270         | <b>60</b> | <b>98</b> | 100–480         | <b>36</b>    | 70–480          |
| Percentage                                                |             |                 |             |           |           |                 |              |                 |
| T cells                                                   |             |                 |             |           |           |                 |              |                 |
| CD3 <sup>+</sup> %                                        | 68          | 56–75           | 66          | <b>78</b> | 74        | 60–76           | <b>31</b>    | 56–84           |
| CD4 <sup>+</sup> %                                        | 43          | 28–47           | 37          | <b>48</b> | 42        | 31–47           | <b>15</b>    | 31–52           |
| CD8 <sup>+</sup> %                                        | 21          | 16–30           | 27          | 28        | 29        | 18–35           | <b>15</b>    | 18–35           |
| CD45RO <sup>+</sup> CD4 <sup>+</sup> %                    | <b>10</b>   | 14–27           | <b>16</b>   | <b>6</b>  | <b>8</b>  | 30–42           | <b>20</b>    | 30–42           |
| CD45RA <sup>+</sup> CD4 <sup>+</sup> %                    | <b>90</b>   | 73–86           | <b>84</b>   | <b>94</b> | <b>92</b> | 58–70           | <b>80</b>    | 58–70           |
| CD31 <sup>+</sup> CD45RA <sup>+</sup> /CD4 <sup>+</sup> % | <b>74</b>   | 57–65           | <b>65</b>   | 51        | <b>47</b> | 43–55           | 55           | 43–55           |
| CCR7 <sup>+</sup> CD45RA <sup>+</sup> /CD8 <sup>+</sup> % | <b>88</b>   | 52–68           | <b>86</b>   | <b>80</b> | <b>82</b> | 52–68           | <b>94</b>    | 52–68           |
| CCR7 <sup>+</sup> CD45RA <sup>-</sup> /CD8 <sup>+</sup> % | <b>1</b>    | 3–4             | <b>1</b>    | 4         | 3         | 3–4             | 4            | 3–4             |
| CCR7 <sup>-</sup> CD45RA <sup>-</sup> /CD8 <sup>+</sup> % | <b>3</b>    | 11–20           | <b>5</b>    | <b>7</b>  | <b>3</b>  | 11–20           | <b>1</b>     | 11–20           |
| CCR7 <sup>-</sup> CD45RA <sup>+</sup> /CD8 <sup>+</sup> % | <b>8</b>    | 16–28           | <b>8</b>    | <b>9</b>  | <b>12</b> | 16–28           | <b>1</b>     | 16–28           |
| CD19 <sup>+</sup> %                                       | 30          | 14–33           | 23          | 19        | 21        | 13–27           | <b>67</b>    | 6–23            |
| CD27 <sup>+</sup> /CD19 <sup>+</sup> %                    | <b>1.8</b>  | >10             | ND          | <b>4</b>  | ND        | 14.7–25.8       | <b>0.7</b>   | 12.6–25.2       |
| CD16 <sup>+</sup> CD56 <sup>+</sup> %                     | 5           | 4–17            | 10          | 3         | 5         | 4–17            | <b>2</b>     | 3–22            |

Bold and underlining indicate values outside of the expected range. ND, not determined.
